# Supplementary material for: Gene-Level Regulation of Acupuncture Therapy in Spontaneously Hypertensive Rats: A Whole Transcriptome Analysis
Source: Evid Based Complement Alternat Med. 2019 Feb 18;2019:9541079. doi: 10.1155/2019/9541079 (PMC6398018; doi:10.1155/2019/9541079)
Supplement: Supplementary Materials — The supplementary information to support the results of transcriptome analysis is available in the online version of this paper. [file 9541079.f1.xlsx]

## Sheet: note
table name	column head	meaning of column head
differential miRNA and the note	Probe Set ID	the number of probe in mRNAs array
	Acc_miRbase20th	the accession number of miRNA in miRBase v.20
	microRNA__miRbase20th	the name of miRNA in miRBase v.20
	P-value	evaluates the significant level of probe sinal, namely the different of gene expression is significant between groups
	FDR	false discovery rate, the judgment for the accuracy of p-value
	Geom mean of intensities in class WKYs	the geometric mean of one probe signal value in WHYs
	Geom mean of intensities in class SHRs	the geometric mean of one probe signal value in SHRs
	Geom mean of intensities in class SHRS+Acu	the geometric mean of one probe signal value in SHRs+Acu
	GeneChip Array	the type of chip
	Species Scientific Name
	Annotation Date
	Sequence Type	the type of probe
	Sequence Source
	Transcript ID(Array Design)	the name of probe
	Alignments	genome location
	Sequence Length
	Sequence	probe sequence
the value of sample signal	ML123_(miRNA-3_0).rma-dabg-Signal	the value of sample signal, assign a value over binary ogarithm
	ML123_(miRNA-3_0).rma-dabg-Detection	the value of sample signal, assign a value over binary ogarithm
	ML456_(miRNA-3_0).rma-dabg-Signal	the value of sample signal, assign a value over binary ogarithm
	ML456_(miRNA-3_0).rma-dabg-Detection	the value of sample signal, assign a value over binary ogarithm
	MR123_(miRNA-3_0).rma-dabg-Signal	the value of sample signal, assign a value over binary ogarithm
	MR123_(miRNA-3_0).rma-dabg-Detection	the value of sample signal, assign a value over binary ogarithm
	MR456_(miRNA-3_0).rma-dabg-Signal	the value of sample signal, assign a value over binary ogarithm
	MR456_(miRNA-3_0).rma-dabg-Detection	the value of sample signal, assign a value over binary ogarithm
	MR789_(miRNA-3_0).rma-dabg-Signal	the value of sample signal, assign a value over binary ogarithm
	MR789_(miRNA-3_0).rma-dabg-Detection	the value of sample signal, assign a value over binary ogarithm
	zhengL123_(miRNA-3_0).rma-dabg-Signal	the value of sample signal, assign a value over binary ogarithm
	zhengL123_(miRNA-3_0).rma-dabg-Detection	the value of sample signal, assign a value over binary ogarithm
	zhengL456_(miRNA-3_0).rma-dabg-Signal	the value of sample signal, assign a value over binary ogarithm
	zhengL456_(miRNA-3_0).rma-dabg-Detection	the value of sample signal, assign a value over binary ogarithm
	zhengR123_(miRNA-3_0).rma-dabg-Signal	the value of sample signal, assign a value over binary ogarithm
	zhengR123_(miRNA-3_0).rma-dabg-Detection	the value of sample signal, assign a value over binary ogarithm
	zhengR456_(miRNA-3_0).rma-dabg-Signal	the value of sample signal, assign a value over binary ogarithm
	zhengR456_(miRNA-3_0).rma-dabg-Detection	the value of sample signal, assign a value over binary ogarithm
	zhengR789_(miRNA-3_0).rma-dabg-Signal	the value of sample signal, assign a value over binary ogarithm
	zhengR789_(miRNA-3_0).rma-dabg-Detection	the value of sample signal, assign a value over binary ogarithm
	ZL123_(miRNA-3_0).rma-dabg-Signal	the value of sample signal, assign a value over binary ogarithm
	ZL123_(miRNA-3_0).rma-dabg-Detection	the value of sample signal, assign a value over binary ogarithm
	ZL8910_(miRNA-3_0).rma-dabg-Signal	the value of sample signal, assign a value over binary ogarithm
	ZL8910_(miRNA-3_0).rma-dabg-Detection	the value of sample signal, assign a value over binary ogarithm
	ZR123_(miRNA-3_0).rma-dabg-Signal	the value of sample signal, assign a value over binary ogarithm
	ZR123_(miRNA-3_0).rma-dabg-Detection	the value of sample signal, assign a value over binary ogarithm
	ZR456_(miRNA-3_0).rma-dabg-Signal	the value of sample signal, assign a value over binary ogarithm
	ZR456_(miRNA-3_0).rma-dabg-Detection	the value of sample signal, assign a value over binary ogarithm
	ZR789_(miRNA-3_0).rma-dabg-Signal	the value of sample signal, assign a value over binary ogarithm
	ZR789_(miRNA-3_0).rma-dabg-Detection	the value of sample signal, assign a value over binary ogarithm

## Sheet: differential miRNA and note
Probe Set ID	Acc_miRbase20th	microRNA__miRbase20th	P-value	FDR	Geom mean of intensities in class zhengchang	Geom mean of intensities in class moxing	Geom mean of intensities in class zhenci	GeneChip Array	Species Scientific Name	Annotation Date	Sequence Type	Sequence Source	Transcript ID(Array Design)	Alignments	Sequence Length	Sequence	ML123_(miRNA-3_0).rma-dabg-Signal	ML123_(miRNA-3_0).rma-dabg-Detection	ML456_(miRNA-3_0).rma-dabg-Signal	ML456_(miRNA-3_0).rma-dabg-Detection	MR123_(miRNA-3_0).rma-dabg-Signal	MR123_(miRNA-3_0).rma-dabg-Detection	MR456_(miRNA-3_0).rma-dabg-Signal	MR456_(miRNA-3_0).rma-dabg-Detection	MR789_(miRNA-3_0).rma-dabg-Signal	MR789_(miRNA-3_0).rma-dabg-Detection	zhengL123_(miRNA-3_0).rma-dabg-Signal	zhengL123_(miRNA-3_0).rma-dabg-Detection	zhengL456_(miRNA-3_0).rma-dabg-Signal	zhengL456_(miRNA-3_0).rma-dabg-Detection	zhengR123_(miRNA-3_0).rma-dabg-Signal	zhengR123_(miRNA-3_0).rma-dabg-Detection	zhengR456_(miRNA-3_0).rma-dabg-Signal	zhengR456_(miRNA-3_0).rma-dabg-Detection	zhengR789_(miRNA-3_0).rma-dabg-Signal	zhengR789_(miRNA-3_0).rma-dabg-Detection	ZL123_(miRNA-3_0).rma-dabg-Signal	ZL123_(miRNA-3_0).rma-dabg-Detection	ZL8910_(miRNA-3_0).rma-dabg-Signal	ZL8910_(miRNA-3_0).rma-dabg-Detection	ZR123_(miRNA-3_0).rma-dabg-Signal	ZR123_(miRNA-3_0).rma-dabg-Detection	ZR456_(miRNA-3_0).rma-dabg-Signal	ZR456_(miRNA-3_0).rma-dabg-Detection	ZR789_(miRNA-3_0).rma-dabg-Signal	ZR789_(miRNA-3_0).rma-dabg-Detection
rno-let-7e_st	MIMAT0000777	rno-let-7e-5p	0.0255622	0.208	5609.99	5477.7	6138.39	miRNA-3_0	Rattus norvegicus	Oct 14, 2011	miRNA	Affymetrix Proprietary Database	rno-let-7e	1:56487134-56487226 (+)	22	UGAGGUAGGAGGUUGUAUAGUU	12.382	P	12.5304	P	12.4799	P	12.4473	P	12.4504	P	12.5925	P	12.5171	P	12.3553	P	12.5171	P	12.3893	P	12.7829	P	12.4808	P	12.5779	P	12.6013	P	12.6367	P
rno-miR-125a-3p_st	MIMAT0004729	rno-miR-125a-3p	0.0253285	0.208	57.57	55.36	73.96	miRNA-3_0	Rattus norvegicus	Oct 14, 2011	miRNA	Affymetrix Proprietary Database	rno-mir-125a	1:56487580-56487664 (+)	22	ACAGGUGAGGUUCUUGGGAGCC	5.91923	P	6.04582	P	5.84338	P	5.71144	P	5.62747	P	6.12498	P	5.87748	P	6.0282	P	5.81467	P	5.49382	P	6.58226	P	6.07997	P	5.87028	P	6.2426	P	6.42997	P
rno-miR-125a-5p_st	MIMAT0000829	rno-miR-125a-5p	0.0340111	0.223	4175.84	4048.67	4560	miRNA-3_0	Rattus norvegicus	Oct 14, 2011	miRNA	Affymetrix Proprietary Database	rno-mir-125a	1:56487580-56487664 (+)	24	UCCCUGAGACCCUUUAACCUGUGA	11.9172	P	12.0382	P	12.0116	P	12.0892	P	12.053	P	12.1229	P	12.2035	P	11.8961	P	12.1395	P	11.8796	P	12.0373	P	12.22	P	12.2797	P	12.2406	P	12.1578	P
rno-miR-127_st	MIMAT0000833	rno-miR-127-3p	0.0277557	0.212	4696.82	4442.56	4866.9	miRNA-3_0	Rattus norvegicus	Oct 14, 2011	miRNA	Affymetrix Proprietary Database	rno-mir-127	6:134184312-134184408 (+)	22	UCGGAUCCGUCUGAGCUUGGCU	12.145	P	12.2874	P	12.164	P	12.096	P	12.0867	P	12.1927	P	12.2599	P	12.1952	P	12.3086	P	12.1333	P	12.3646	P	12.2178	P	12.238	P	12.3469	P	12.2379	P
rno-miR-129-2-star_st	MIMAT0000601	rno-miR-129-2-3p	0.0487169	0.27	435.18	355.89	375.55	miRNA-3_0	Rattus norvegicus	Oct 14, 2011	miRNA	Affymetrix Proprietary Database	rno-mir-129-2	3:78648931-78649027 (-)	22	AAGCCCUUACCCCAAAAAGCAU	8.71889	P	8.46654	P	8.1858	P	8.56531	P	8.63297	P	8.96769	P	8.65448	P	8.72006	P	8.93025	P	8.65734	P	8.29738	P	8.77382	P	8.58466	P	8.62743	P	8.64225	P
rno-miR-130b_st	MIMAT0000837	rno-miR-130b-3p	0.0011361	0.0365	2.05	2.32	3.63	miRNA-3_0	Rattus norvegicus	Oct 14, 2011	miRNA	Affymetrix Proprietary Database	rno-mir-130b	11:85885595-85885676 (+)	22	CAGUGCAAUGAUGAAAGGGCAU	1.41969	P	1.41969	A	1.31253	P	1.06264	A	1.04578	A	1.51947	P	0.849131	A	0.793545	A	1.4135	P	0.712699	A	1.87128	P	2.16413	P	1.87176	P	2.01948	P	1.53039	P
rno-miR-132_st	MIMAT0000838	rno-miR-132-3p	0.0010111	0.0361	1956.65	1930.46	2301.18	miRNA-3_0	Rattus norvegicus	Oct 14, 2011	miRNA	Affymetrix Proprietary Database	rno-mir-132	10:62480727-62480827 (+)	22	UAACAGUCUACAGCCAUGGUCG	10.8477	P	10.9786	P	10.944	P	11.0101	P	10.9864	P	11.101	P	10.9489	P	10.8098	P	10.9792	P	10.9344	P	11.2586	P	11.1357	P	11.0753	P	11.2651	P	11.2674	P
rno-miR-134_st	MIMAT0000840	rno-miR-134-5p	0.015355	0.183	405.72	442.41	531.79	miRNA-3_0	Rattus norvegicus	Oct 14, 2011	miRNA	Affymetrix Proprietary Database	rno-mir-134	6:134415632-134415704 (+)	22	UGUGACUGGUUGACCAGAGGGG	8.73907	P	9.12786	P	8.83101	P	8.73054	P	8.71088	P	8.91844	P	8.78343	P	8.46759	P	8.73974	P	8.51487	P	9.39548	P	8.89022	P	8.8918	P	9.15264	P	9.10474	P
rno-miR-146b_st	MIMAT0005595	rno-miR-146b-5p	0.0481406	0.27	368.58	435.91	482.83	miRNA-3_0	Rattus norvegicus	Oct 14, 2011	miRNA	Affymetrix Proprietary Database	rno-mir-146b	1:251558047-251558134 (+)	24	UGAGAACUGAAUUCCAUAGGCUGU	8.91433	P	8.83506	P	8.51482	P	9.00174	P	8.7667	P	8.71843	P	9.00423	P	8.19018	P	8.71033	P	8.10843	P	8.93407	P	9.01246	P	8.84263	P	8.89909	P	9.04996	P
rno-miR-150_st	MIMAT0000853	rno-miR-150-5p	0.0315157	0.22	1112.16	1022.3	1256.79	miRNA-3_0	Rattus norvegicus	Oct 14, 2011	miRNA	Affymetrix Proprietary Database	rno-mir-150	1:95596077-95596161 (+)	22	UCUCCCAACCCUUGUACCAGUG	9.78815	P	10.0018	P	10.1046	P	10.0879	P	10.1986	P	10.3825	P	10.3308	P	9.98898	P	10.171	P	9.8248	P	10.1962	P	10.3165	P	10.3422	P	10.3797	P	10.4043	P
rno-miR-151-star_st	MIMAT0000614	rno-miR-151-3p	0.0209509	0.192	255.03	266.01	323.69	miRNA-3_0	Rattus norvegicus	Oct 14, 2011	miRNA	Affymetrix Proprietary Database	rno-mir-151	7:110979296-110979392 (-)	21	CUAGACUGAGGCUCCUUGAGG	8.26981	P	8.38119	P	7.86062	P	7.96639	P	7.99183	P	8.175	P	8.21118	P	8.02003	P	8.02264	P	7.64613	P	8.5193	P	8.175	P	8.23276	P	8.48224	P	8.44441	P
rno-miR-16_st	MIMAT0000785	rno-miR-16-5p	0.0008558	0.0343	2209.26	2581.69	1858.89	miRNA-3_0	Rattus norvegicus	Oct 14, 2011	miRNA	Affymetrix Proprietary Database	rno-mir-16	2:158992383-158992477 (+)	22	UAGCAGCACGUAAAUAUUGGCG	11.5558	P	11.3315	P	11.2371	P	11.4231	P	11.3162	P	10.833	P	11.2559	P	11.2767	P	11.1527	P	11.1308	P	10.7238	P	10.8898	P	11.0603	P	11.0076	P	10.7809	P
rno-miR-204-star_st	MIMAT0004739	rno-miR-204-3p	0.0174626	0.192	110.9	126.87	154.79	miRNA-3_0	Rattus norvegicus	Oct 14, 2011	miRNA	Affymetrix Proprietary Database	rno-mir-204	1:226012994-226013103 (+)	22	GCUGGGAAGGCAAAGGGACGUU	7.16011	P	7.44312	P	7.08556	P	6.7563	P	6.68424	P	6.95173	P	6.78989	P	6.83048	P	6.74105	P	6.75474	P	7.64774	P	7.19326	P	7.10567	P	7.19398	P	7.39131	P
rno-miR-208_st	MIMAT0000880	rno-miR-208a-3p	0.0007692	0.0343	6.7	1.61	11.28	miRNA-3_0	Rattus norvegicus	Oct 14, 2011	miRNA	Affymetrix Proprietary Database	rno-mir-208	15:33051957-33052039 (-)	18	AUAAGACGAGCAAAAAGC	1.0361	A	0.945379	P	0.418967	A	0.634355	A	0.60266	A	3.76998	P	0.749507	A	3.71519	P	3.02407	P	2.56516	P	2.76268	P	4.2399	P	3.90466	P	4.17742	P	2.55714	P
rno-miR-208b-3p_st	MIMAT0017845	rno-miR-208b-3p	0.0043974	0.109	2	1.41	1.79	miRNA-3_0	Rattus norvegicus	Oct 14, 2011	miRNA	Affymetrix Proprietary Database	rno-mir-208b	15:33078016-33078127 (-)	18	AUAAGACGAACAAAAGGU	0.541827	P	0.922933	P	0.475657	P	0.521647	P	0.209052	A	0.965134	P	0.933897	P	1.00447	P	1.05691	P	1.15303	P	0.912707	P	0.932946	P	1.00316	P	0.588259	A	0.91667	P
rno-miR-20a_st	MIMAT0000602	rno-miR-20a-5p	0.0083428	0.149	132.21	146.85	121.77	miRNA-3_0	Rattus norvegicus	Oct 14, 2011	miRNA	Affymetrix Proprietary Database	rno-mir-20a	15:99854190-99854274 (+)	23	UAAAGUGCUUAUAGUGCAGGUAG	7.39485	P	7.26502	P	7.10805	P	7.26914	P	7.1472	P	7.098	P	7.24609	P	7.10805	P	6.96478	P	6.91896	P	6.80725	P	6.76493	P	7.01337	P	7.10805	P	7.10805	P
rno-miR-210_st	MIMAT0000881	rno-miR-210-3p	0.0426463	0.249	52.34	66.56	61.38	miRNA-3_0	Rattus norvegicus	Oct 14, 2011	miRNA	Affymetrix Proprietary Database	rno-mir-210	1:201415656-201415765 (-)	22	CUGUGCGUGUGACAGCGGCUGA	6.4532	P	5.98068	P	6.06197	P	5.98081	P	5.99986	P	5.87499	P	5.55554	P	6.00131	P	5.79929	P	5.42025	P	6.13701	P	5.69917	P	6.0139	P	6.03587	P	5.97342	P
rno-miR-212_st	MIMAT0000883	rno-miR-212-3p	0.01051	0.161	288.29	349.73	390.9	miRNA-3_0	Rattus norvegicus	Oct 14, 2011	miRNA	Affymetrix Proprietary Database	rno-mir-212	10:62480434-62480544 (+)	22	UAACAGUCUCCAGUCACGGCCA	8.46047	P	8.64648	P	8.48417	P	8.44713	P	8.40538	P	8.43238	P	8.29918	P	7.76445	P	8.46047	P	8.00284	P	8.85455	P	8.38264	P	8.59518	P	8.69092	P	8.69123	P
rno-miR-221-star_st	MIMAT0017163	rno-miR-221-5p	0.0457751	0.262	1.78	1.71	2.23	miRNA-3_0	Rattus norvegicus	Oct 14, 2011	miRNA	Affymetrix Proprietary Database	rno-mir-221	X:14935617-14935725 (+)	23	ACCUGGCAUACAAUGUAGAUUUC	0.561174	A	0.953117	A	0.640604	P	0.953117	P	0.939741	P	0.953117	A	1.09681	P	0.736322	A	0.953117	P	0.519792	P	0.970959	P	1.18647	P	1.69984	P	1.08175	P	1.00872	P
rno-miR-221_st	MIMAT0000890	rno-miR-221-3p	1.61e-05	0.00258	419.99	311.93	333.58	miRNA-3_0	Rattus norvegicus	Oct 14, 2011	miRNA	Affymetrix Proprietary Database	rno-mir-221	X:14935617-14935725 (+)	23	AGCUACAUUGUCUGCUGGGUUUC	8.24779	P	8.29973	P	8.25973	P	8.46556	P	8.34587	P	8.82598	P	8.75836	P	8.70258	P	8.71945	P	8.66702	P	8.53272	P	8.28943	P	8.47494	P	8.30455	P	8.46918	P
rno-miR-222_st	MIMAT0000891	rno-miR-222-3p	0.000742	0.0343	623.64	479.67	547.18	miRNA-3_0	Rattus norvegicus	Oct 14, 2011	miRNA	Affymetrix Proprietary Database	rno-mir-222	X:14935056-14935158 (+)	21	AGCUACAUCUGGCUACUGGGU	9.02912	P	9.04433	P	8.81843	P	9.00479	P	8.82595	P	9.46887	P	9.31213	P	9.19325	P	9.5011	P	9.04993	P	9.08468	P	9.0412	P	9.14728	P	9.11387	P	9.25365	P
rno-miR-223_st	MIMAT0000892	rno-miR-223-3p	0.0091017	0.149	2.08	4.03	2.14	miRNA-3_0	Rattus norvegicus	Oct 14, 2011	miRNA	Affymetrix Proprietary Database	rno-mir-223	X:83869053-83869162 (+)	21	UGUCAGUUUGUCAAAUACCCC	2.30638	P	2.75101	P	1.45867	P	2.00556	P	1.72027	P	0.889359	A	1.86575	P	1.30076	A	0.959288	A	0.361311	A	0.787885	A	1.17773	P	1.65983	P	1.06245	A	0.953117	A
rno-miR-22_st	MIMAT0000791	rno-miR-22-3p	0.0330599	0.223	1154.32	1241.23	950.83	miRNA-3_0	Rattus norvegicus	Oct 14, 2011	miRNA	Affymetrix Proprietary Database	rno-mir-22	10:62782723-62782817 (+)	22	AAGCUGCCAGUUGAAGAACUGU	10.6379	P	10.2828	P	10.129	P	10.294	P	10.2374	P	9.87244	P	10.2642	P	10.3337	P	10.1774	P	10.3188	P	9.78978	P	10.0887	P	10.1594	P	9.99281	P	9.59587	P
rno-miR-23a_st	MIMAT0000792	rno-miR-23a-3p	0.0187907	0.192	2515.93	2282.15	2415.3	miRNA-3_0	Rattus norvegicus	Oct 14, 2011	miRNA	Affymetrix Proprietary Database	rno-mir-23a	19:25638744-25638818 (-)	21	AUCACAUUGCCAGGGAUUUCC	11.221	P	11.1634	P	11.1732	P	11.2115	P	11.205	P	11.2675	P	11.2509	P	11.3057	P	11.4076	P	11.3552	P	11.2151	P	11.1964	P	11.349	P	11.2721	P	11.3187	P
rno-miR-24_st	MIMAT0000794	rno-miR-24-3p	0.0377844	0.23	3597.43	3288.41	3558.68	miRNA-3_0	Rattus norvegicus	Oct 14, 2011	miRNA	Affymetrix Proprietary Database	rno-mir-24-1 // rno-mir-24-2	17:7350971-7351038 (-) // 19:25638430-25638537 (-)	22	UGGCUCAGUUCAGCAGGAACAG	11.7323	P	11.7621	P	11.7017	P	11.699	P	11.714	P	11.8713	P	11.7547	P	11.9305	P	11.7567	P	11.8529	P	11.8599	P	11.7701	P	11.7932	P	11.8068	P	11.9169	P
rno-miR-27a_st	MIMAT0000799	rno-miR-27a-3p	0.0091492	0.149	345.6	395.34	286.21	miRNA-3_0	Rattus norvegicus	Oct 14, 2011	miRNA	Affymetrix Proprietary Database	rno-mir-27a	19:25638578-25638664 (-)	21	UUCACAGUGGCUAAGUUCCGC	8.86835	P	8.6185	P	8.38413	P	8.76516	P	8.6917	P	8.21575	P	8.60197	P	8.44841	P	8.44393	P	8.55722	P	7.78277	P	8.11917	P	8.40847	P	8.45523	P	8.20027	P
rno-miR-30c-2-star_st	MIMAT0005442	rno-miR-30c-2-3p	0.0404891	0.241	69.21	76.27	82.21	miRNA-3_0	Rattus norvegicus	Oct 14, 2011	miRNA	Affymetrix Proprietary Database	rno-mir-30c-2	9:22162630-22162713 (+)	22	CUGGGAGAAGGCUGUUUACUCU	6.42398	P	6.37109	P	6.24714	P	6.28244	P	6.13395	P	6.22409	P	6.37787	P	6.15667	P	5.99291	P	5.91567	P	6.53565	P	6.28244	P	6.20949	P	6.36829	P	6.57165	P
rno-miR-31_st	MIMAT0000810	rno-miR-31a-5p	3.98e-05	0.00426	395.05	273.34	248.75	miRNA-3_0	Rattus norvegicus	Oct 14, 2011	miRNA	Affymetrix Proprietary Database	rno-mir-31	5:108497649-108497754 (-)	22	AGGCAAGAUGCUGGCAUAGCUG	8.42123	P	8.12494	P	8.11175	P	7.94024	P	8.06765	P	8.63472	P	8.63379	P	8.91666	P	8.6296	P	8.4171	P	8.05221	P	7.76018	P	7.95781	P	8.07875	P	8.10505	P
rno-miR-325-5p_st	MIMAT0000557	rno-miR-325-5p	0.0223878	0.194	124.7	155.62	136.8	miRNA-3_0	Rattus norvegicus	Oct 14, 2011	miRNA	Affymetrix Proprietary Database	rno-mir-325	X:93480419-93480516 (-)	23	CCUAGUAGGUGCUCAGUAAGUGU	7.57745	P	7.38114	P	7.12099	P	7.37407	P	7.14909	P	6.69398	P	7.21407	P	7.10386	P	7.06344	P	6.83872	P	7.04756	P	7.13293	P	7.06429	P	7.2999	P	7.09633	P
rno-miR-328a-star_st	MIMAT0017029	rno-miR-328a-5p	0.0275118	0.212	49.29	50.94	25.3	miRNA-3_0	Rattus norvegicus	Oct 14, 2011	miRNA	Affymetrix Proprietary Database	rno-mir-328a	19:35122554-35122637 (-)	19	GGGGGGCAGGAGGGGCUCA	5.98385	P	5.36565	P	6.01312	P	5.5139	P	5.6696	P	4.99317	P	5.77437	P	5.68459	P	4.96266	P	6.80419	P	5.30669	P	4.74475	P	4.68947	P	3.85883	P	4.86639	P
rno-miR-335_st	MIMAT0000575	rno-miR-335	0.0002987	0.0192	26.14	8.59	35.57	miRNA-3_0	Rattus norvegicus	Oct 14, 2011	miRNA	Affymetrix Proprietary Database	rno-mir-335		23	UCAAGAGCAAUAACGAAAAAUGU	3.27959	P	2.7923	P	4.23582	P	3.22282	P	2.17589	P	4.82383	P	4.28834	P	4.97875	P	4.93881	P	4.61299	P	4.87693	P	5.81529	P	5.6212	P	5.19203	P	4.41918	P
rno-miR-337_st	MIMAT0000577	rno-miR-337-3p	0.0027524	0.0803	3.21	8.15	3.2	miRNA-3_0	Rattus norvegicus	Oct 14, 2011	miRNA	Affymetrix Proprietary Database	rno-mir-337	6:134176751-134176847 (+)	23	UUCAGCUCCUAUAUGAUGCCUUU	3.32315	P	2.24666	P	2.65078	P	3.40705	P	3.70049	P	1.15387	A	2.57117	P	0.981868	A	2.26613	P	1.552	P	1.4644	P	1.71367	A	2.1395	P	1.95041	P	1.29014	A
rno-miR-342-3p_st	MIMAT0000589	rno-miR-342-3p	0.0365358	0.23	1093.14	1070.91	1288.92	miRNA-3_0	Rattus norvegicus	Oct 14, 2011	miRNA	Affymetrix Proprietary Database	rno-mir-342	6:132990797-132990895 (+)	23	UCUCACACAGAAAUCGCACCCGU	10.1373	P	10.1039	P	10.1885	P	10.004	P	10.0826	P	10.4403	P	10.1429	P	10.1367	P	10.1363	P	9.71748	P	10.4794	P	10.2545	P	10.2104	P	10.3789	P	10.4977	P
rno-miR-344a-3p_st	MIMAT0000592	rno-miR-344a-3p	0.0201746	0.192	171.71	209.21	188.68	miRNA-3_0	Rattus norvegicus	Oct 14, 2011	miRNA	Affymetrix Proprietary Database	rno-mir-344a-1	1:116020984-116021081 (-)	23	UGAUCUAGCCAAAGCCUGACCGU	7.96668	P	7.66359	P	7.76535	P	7.58218	P	7.75947	P	7.35548	P	7.51574	P	7.24876	P	7.63985	P	7.46179	P	7.58892	P	7.55798	P	7.55036	P	7.82853	P	7.43445	P
rno-miR-34a-star_st	MIMAT0017106	rno-miR-34a-3p	0.0366785	0.23	21.49	29.03	12.29	miRNA-3_0	Rattus norvegicus	Oct 14, 2011	miRNA	Affymetrix Proprietary Database	rno-mir-34a	5:167187897-167187998 (+)	22	AAUCAGCAAGUAUACUGCCCUA	5.51584	P	4.17667	P	4.54136	P	5.22899	P	5.02794	P	3.66724	P	5.09737	P	4.00333	P	4.69421	P	4.76936	P	2.1726	P	4.19352	P	4.10504	P	4.1841	P	3.60568	P
rno-miR-3584-5p_st	MIMAT0017875	rno-miR-3584-5p	0.0192787	0.192	26.56	32.98	19.19	miRNA-3_0	Rattus norvegicus	Oct 14, 2011	miRNA	Affymetrix Proprietary Database	rno-mir-3584	1:253307488-253307568 (-)	18	GGGAGGAGUCCAGGAGGC	5.12189	P	5.38447	P	4.87223	P	5.05629	P	4.9758	P	4.19114	P	4.64116	P	4.48556	P	4.87537	P	5.56581	P	4.12016	P	3.99266	P	4.56615	P	4.15291	P	4.64126	P
rno-miR-370_st	MIMAT0003122	rno-miR-370-3p	0.0306814	0.219	31.06	25.98	36.64	miRNA-3_0	Rattus norvegicus	Oct 14, 2011	miRNA	Affymetrix Proprietary Database	rno-mir-370	6:134210194-134210272 (+)	22	GCCUGCUGGGGUGGAACCUGGU	4.8776	P	4.85867	P	4.52497	P	4.50821	P	4.92167	P	5.22665	P	4.9509	P	4.9509	P	5.0987	P	4.65999	P	5.69967	P	4.73702	P	5.01609	P	5.34964	P	5.33637	P
rno-miR-376b-3p_st	MIMAT0003196	rno-miR-376b-3p	0.0153138	0.183	32.92	22.76	19.44	miRNA-3_0	Rattus norvegicus	Oct 14, 2011	miRNA	Affymetrix Proprietary Database	rno-mir-376b	6:134404180-134404265 (+)	21	AUCAUAGAGGAACAUCCACUU	5.09118	P	4.28542	P	4.06722	P	4.84568	P	4.44633	P	5.04631	P	4.811	P	4.84571	P	5.22256	P	5.38204	P	3.67244	P	4.18419	P	4.56529	P	4.55175	P	4.59339	P
rno-miR-378_st	MIMAT0003379	rno-miR-378a-3p	0.0002545	0.0192	223.15	251.16	301.39	miRNA-3_0	Rattus norvegicus	Oct 14, 2011	miRNA	Affymetrix Proprietary Database	rno-mir-378	18:57377805-57377869 (-)	21	ACUGGACUUGGAGUCAGAAGG	8.07371	P	7.98952	P	8.08934	P	7.92134	P	7.98168	P	7.90942	P	7.6872	P	7.93446	P	7.85081	P	7.72985	P	8.47879	P	8.13556	P	8.19134	P	8.22206	P	8.31106	P
rno-miR-379_st	MIMAT0003192	rno-miR-379-5p	0.0215581	0.192	901.52	777.39	918.14	miRNA-3_0	Rattus norvegicus	Oct 14, 2011	miRNA	Affymetrix Proprietary Database	rno-mir-379	6:134388198-134388282 (+)	21	UGGUAGACUAUGGAACGUAGG	9.69235	P	9.77251	P	9.49876	P	9.67926	P	9.56272	P	9.93257	P	9.8841	P	9.64299	P	9.79983	P	9.92395	P	10.1152	P	9.77412	P	9.80395	P	9.76001	P	9.92092	P
rno-miR-382_st	MIMAT0003201	rno-miR-382-5p	0.0177454	0.192	1328.8	1426.45	1674.09	miRNA-3_0	Rattus norvegicus	Oct 14, 2011	miRNA	Affymetrix Proprietary Database	rno-mir-382	6:134415263-134415342 (+)	22	GAAGUUGUUCGUGGUGGAUUCG	10.3948	P	10.5695	P	10.5517	P	10.463	P	10.6051	P	10.5514	P	10.7089	P	10.0372	P	10.3887	P	10.2957	P	10.9031	P	10.556	P	10.6826	P	10.726	P	10.8394	P
rno-miR-383_st	MIMAT0003114	rno-miR-383-5p	0.0072523	0.145	622.13	548.57	728	miRNA-3_0	Rattus norvegicus	Oct 14, 2011	miRNA	Affymetrix Proprietary Database	rno-mir-383	16:57663841-57663914 (+)	21	CAGAUCAGAAGGUGACUGUGG	9.09782	P	9.35154	P	9.11484	P	9.01929	P	9.10734	P	9.55757	P	9.26148	P	9.41479	P	9.27386	P	9	P	9.83307	P	9.43759	P	9.41995	P	9.50216	P	9.50751	P
rno-miR-410_st	MIMAT0005311	rno-miR-410-3p	0.0059598	0.137	14.9	18.77	7.77	miRNA-3_0	Rattus norvegicus	Oct 14, 2011	miRNA	Affymetrix Proprietary Database	rno-mir-410	6:134425082-134425157 (+)	21	AAUAUAACACAGAUGGCCUGU	4.8046	P	3.52566	P	3.88246	P	4.84906	P	4.28363	P	3.80736	P	4.5457	P	3.2085	P	4.00861	P	4.01661	P	2.50917	P	3.06004	P	3.14565	P	3.78158	P	2.45681	P
rno-miR-411_st	MIMAT0005312	rno-miR-411-5p	0.0283873	0.212	103.64	133.93	83.86	miRNA-3_0	Rattus norvegicus	Oct 14, 2011	miRNA	Affymetrix Proprietary Database	rno-mir-411	6:134389347-134389422 (+)	21	UAGUAGACCGUAUAGCGUACG	7.52493	P	6.79907	P	6.85482	P	7.34392	P	6.99693	P	6.21124	P	7.16196	P	6.18591	P	6.86924	P	7.15132	P	6.19385	P	6.47578	P	6.65421	P	6.38258	P	6.40461	P
rno-miR-466b-2-star_st	MIMAT0017286	rno-miR-466b-2-3p	3.2e-06	0.00103	28.87	7.36	5.31	miRNA-3_0	Rattus norvegicus	Oct 14, 2011	miRNA	Affymetrix Proprietary Database	rno-mir-466b-2	17:79288534-79288615 (-)	21	AUAUACAUACACACAUACACA	3.21819	P	3.14931	P	2.94948	P	3.06027	P	2.21625	P	4.63074	P	4.82375	P	5.7084	P	5.03453	P	4.16299	P	2.68057	P	2.15885	P	2.74931	P	2.02679	P	2.58652	P
rno-miR-483-star_st	MIMAT0017201	rno-miR-483-5p	0.0307579	0.219	5.59	3.44	7.9	miRNA-3_0	Rattus norvegicus	Oct 14, 2011	miRNA	Affymetrix Proprietary Database	rno-mir-483	1:202910609-202910681 (-)	22	AAGACGGGAGAAGAGAAGGGAG	1.74963	A	1.26129	A	2.77416	P	1.31617	A	2.00095	P	2.67354	P	2.92892	P	3.07331	P	2.21808	P	1.62177	P	3.858	P	3.42538	P	3.00759	P	2.42123	P	2.35821	P
rno-miR-490-star_st	MIMAT0017356	rno-miR-490-5p	0.015339	0.183	51.61	68.75	72.62	miRNA-3_0	Rattus norvegicus	Oct 14, 2011	miRNA	Affymetrix Proprietary Database	rno-mir-490	4:63815387-63815470 (+)	20	CCAUGGAUCUCCAGGUGGGU	6.09918	P	6.13447	P	6.22151	P	6.02586	P	6.22895	P	5.90439	P	6.09918	P	5.1862	P	5.7915	P	5.56838	P	6.63497	P	6.04994	P	6.0015	P	6.26336	P	6.12283	P
rno-miR-497_st	MIMAT0003383	rno-miR-497-5p	0.0333623	0.223	39.17	53.53	33.45	miRNA-3_0	Rattus norvegicus	Oct 14, 2011	miRNA	Affymetrix Proprietary Database	rno-mir-497	10:57073846-57073914 (+)	22	CAGCAGCACACUGUGGUUUGUA	6.29829	P	5.43644	P	5.69445	P	5.72355	P	5.75238	P	4.55392	P	5.27286	P	5.64476	P	5.40671	P	5.68242	P	5.16334	P	4.74023	P	5.40447	P	4.91807	P	5.25504	P
rno-miR-532-3p_st	MIMAT0005323	rno-miR-532-3p	0.025976	0.208	65.95	64.53	79.88	miRNA-3_0	Rattus norvegicus	Oct 14, 2011	miRNA	Affymetrix Proprietary Database	rno-mir-532	X:27323147-27323225 (+)	22	CCUCCCACACCCAAGGCUUGCA	5.97438	P	6.26512	P	6.12973	P	5.92191	P	5.96202	P	6.21806	P	6.09176	P	6.13122	P	6.25138	P	5.62689	P	6.4931	P	6.15406	P	6.38392	P	6.40181	P	6.32711	P
rno-miR-551b_st	MIMAT0005596	rno-miR-551b-3p	0.0379781	0.23	20.12	35.17	21.51	miRNA-3_0	Rattus norvegicus	Oct 14, 2011	miRNA	Affymetrix Proprietary Database	rno-mir-551b	2:114095878-114095975 (+)	23	GGCGACCCAUACUUGGUUUCAGU	5.68077	P	5.16404	P	4.79473	P	4.93645	P	5.29893	P	4.26157	P	4.76921	P	3.38343	P	4.63239	P	4.70918	P	3.9994	P	4.7989	P	4.84413	P	4.81358	P	3.84009	P
rno-miR-582-star_st	MIMAT0017360	rno-miR-582-3p	0.0139983	0.183	9.94	17.14	15.63	miRNA-3_0	Rattus norvegicus	Oct 14, 2011	miRNA	Affymetrix Proprietary Database	rno-mir-582	2:40714116-40714196 (+)	22	AACCUGUUGAACAACUGAACCC	4.75602	P	4.05987	P	3.68075	P	4.12565	P	4.0653	P	3.78612	P	3.56346	P	2.69922	P	3.26676	P	3.35287	P	3.58366	P	4.56463	P	4.11719	P	3.8634	P	3.8634	P
rno-miR-664-1-star_st	MIMAT0017228	rno-miR-664-1-5p	0.0135149	0.183	51.05	54.46	63.77	miRNA-3_0	Rattus norvegicus	Oct 14, 2011	miRNA	Affymetrix Proprietary Database	rno-mir-664-1	18:47881354-47881412 (+)	21	CUGGCUGGGGAAAAAGAUUGG	5.82722	P	5.73212	P	5.85519	P	5.80253	P	5.81138	P	5.85519	P	6.09975	P	5.52703	P	5.54497	P	5.44502	P	5.97599	P	6.11774	P	6.08039	P	6.01332	P	5.94755	P
rno-miR-672_st	MIMAT0005327	rno-miR-672-5p	0.0212734	0.192	103.23	114.15	139.2	miRNA-3_0	Rattus norvegicus	Oct 14, 2011	miRNA	Affymetrix Proprietary Database	rno-mir-672	X:92107908-92107987 (-)	23	UGAGGUUGGUGUACUGUGUGUGA	6.90313	P	6.99648	P	6.97599	P	6.77971	P	6.71178	P	7.07915	P	6.86984	P	6.46453	P	6.6763	P	6.46123	P	7.39912	P	6.81939	P	6.94037	P	7.22587	P	7.38181	P
rno-miR-743b_st	MIMAT0005280	rno-miR-743b-3p	0.0042519	0.109	2.04	1.75	2.77	miRNA-3_0	Rattus norvegicus	Oct 14, 2011	miRNA	Affymetrix Proprietary Database	rno-mir-743b	X:152822276-152822352 (-)	22	GAAAGACACCAUACUGAAUAGA	0.977449	A	0.690447	A	1.06861	P	0.83689	A	0.652689	A	0.942876	P	1.12554	P	1.26993	A	0.950947	A	0.950947	P	1.56254	P	1.35066	P	1.89648	P	1.75877	P	0.950947	A
rno-miR-770-star_st	MIMAT0017317	rno-miR-770-3p	0.009297	0.149	99.99	75.27	85.16	miRNA-3_0	Rattus norvegicus	Oct 14, 2011	miRNA	Affymetrix Proprietary Database	rno-mir-770	6:134141361-134141436 (+)	17	GUGGGCCUGACGUGGAG	5.97969	P	6.54288	P	6.30194	P	6.21904	P	6.31946	P	6.70322	P	6.8031	P	6.51018	P	6.69702	P	6.60715	P	6.64156	P	6.11072	P	6.42473	P	6.51785	P	6.52661	P
rno-miR-770_st	MIMAT0005338	rno-miR-770-5p	0.0064297	0.138	221.1	166.8	202.62	miRNA-3_0	Rattus norvegicus	Oct 14, 2011	miRNA	Affymetrix Proprietary Database	rno-mir-770	6:134141361-134141436 (+)	22	AGCACCACGUGUCUGGGCCACG	7.57828	P	7.4903	P	7.4784	P	7.25549	P	7.30066	P	7.91801	P	7.65046	P	7.73215	P	7.92432	P	7.82031	P	7.97403	P	7.63463	P	7.72221	P	7.41576	P	7.72796	P
rno-miR-93_st	MIMAT0000817	rno-miR-93-5p	0.0153531	0.183	352.75	408.91	370.38	miRNA-3_0	Rattus norvegicus	Oct 14, 2011	miRNA	Affymetrix Proprietary Database	rno-mir-93	12:17608173-17608259 (-)	23	CAAAGUGCUGUUCGUGCAGGUAG	8.8786	P	8.64433	P	8.67328	P	8.66778	P	8.70743	P	8.41839	P	8.63921	P	8.68158	P	8.39897	P	8.27679	P	8.57783	P	8.51888	P	8.56588	P	8.6031	P	8.5599	P
rno-miR-99a_st	MIMAT0000820	rno-miR-99a-5p	0.0180917	0.192	1360.54	1320.66	1188.14	miRNA-3_0	Rattus norvegicus	Oct 14, 2011	miRNA	Affymetrix Proprietary Database	rno-mir-99a	11:16397544-16397624 (+)	22	AACCCGUAGAUCCGAUCUUGUG	10.4639	P	10.3256	P	10.3247	P	10.472	P	10.4422	P	10.3588	P	10.3975	P	10.4904	P	10.4878	P	10.4177	P	10.0567	P	10.2842	P	10.3652	P	10.3604	P	10.1673	P

## Sheet: differential miRNA-list
microRNA
rno-let-7e-5p
rno-miR-125a-3p
rno-miR-125a-5p
rno-miR-127-3p
rno-miR-129-2-3p
rno-miR-130b-3p
rno-miR-132-3p
rno-miR-134-5p
rno-miR-146b-5p
rno-miR-150-5p
rno-miR-151-3p
rno-miR-16-5p
rno-miR-204-3p
rno-miR-208a-3p
rno-miR-208b-3p
rno-miR-20a-5p
rno-miR-210-3p
rno-miR-212-3p
rno-miR-221-3p
rno-miR-221-5p
rno-miR-222-3p
rno-miR-223-3p
rno-miR-22-3p
rno-miR-23a-3p
rno-miR-24-3p
rno-miR-27a-3p
rno-miR-30c-2-3p
rno-miR-31a-5p
rno-miR-325-5p
rno-miR-328a-5p
rno-miR-335
rno-miR-337-3p
rno-miR-342-3p
rno-miR-344a-3p
rno-miR-34a-3p
rno-miR-3584-5p
rno-miR-370-3p
rno-miR-376b-3p
rno-miR-378a-3p
rno-miR-379-5p
rno-miR-382-5p
rno-miR-383-5p
rno-miR-410-3p
rno-miR-411-5p
rno-miR-466b-2-3p
rno-miR-483-5p
rno-miR-490-5p
rno-miR-497-5p
rno-miR-532-3p
rno-miR-551b-3p
rno-miR-582-3p
rno-miR-664-1-5p
rno-miR-672-5p
rno-miR-743b-3p
rno-miR-770-3p
rno-miR-770-5p
rno-miR-93-5p
rno-miR-99a-5p
